# Supplementary material
Source: publisher site journal article supplement (https://www.spandidos-publications.com/3288/downloadSupplementary)

Figure S1. Transfection of miR-223 mimics led to the upregulation of miR-223 expression, which validated the successful transfection of miR-223 mimics. (A) The successful transfection of miR-223 mimics evidently upregulated miR-223 expression in SH-SY5Y cells. (B) The successful transfection of miR-223 mimics evidently upregulated miR-223 expression in U251 cells. \* $P < 0.05$  vs. miR-223 NC group. miR, microRNA; NC, negative control.

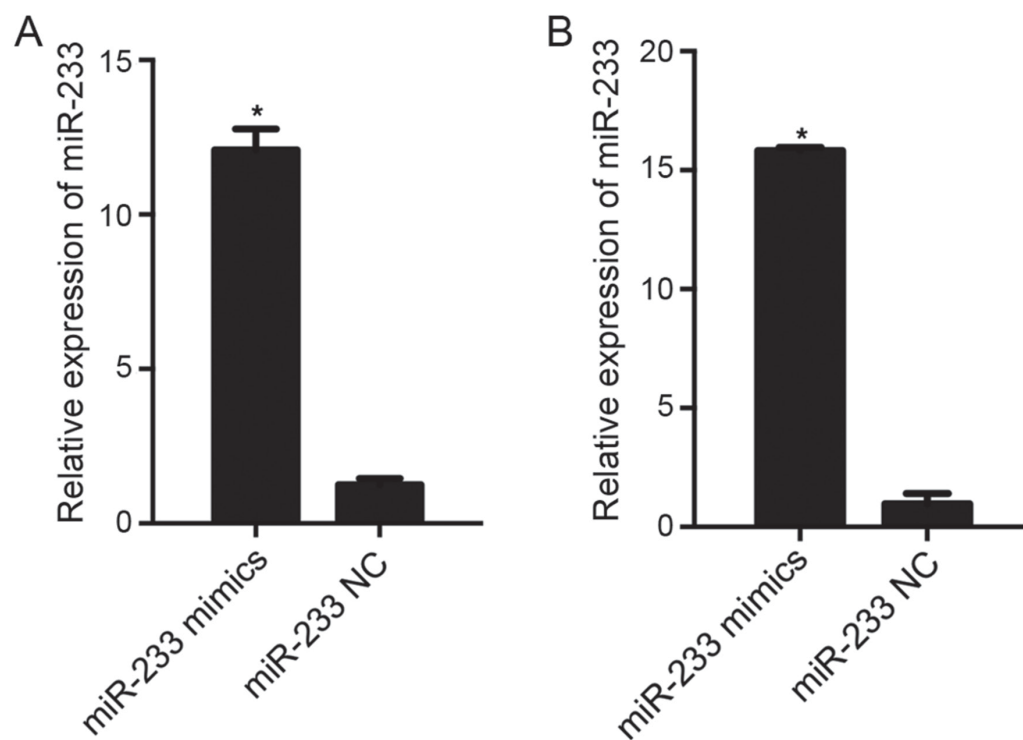

Supplement: Supplementary file 1 [file downloadSupplementary]
